# Supplementary material for: Challenging Misconceptions about Race in Undergraduate Genetics
Source: Atypon-hosted journal article supplement (doi:10.1187/cbe.23-12-0228), 2024-07-09
Supplement: combinedsupmats.pdf [file combinedsupmats.pdf]

# Supplemental Material

*CBE—Life Sciences Education*

Ball *et al.*

# Supplemental Text for “Challenging Misconceptions About Race in Undergraduate Genetics”

## Table of Contents

|                                         |          |
|-----------------------------------------|----------|
| <b>Regression Tables</b> .....          | <b>2</b> |
| Table S1 .....                          | 2        |
| Table S2 .....                          | 3        |
| Table S3 .....                          | 4        |
| Table S4.....                           | 5        |
| <b>Finalized Survey Subscales</b> ..... | <b>6</b> |

**Table S1***Biological essentialism Regression Table for Spring 2022*

| Post - Pre                   | $b_0$                   | $b_{LC}$                  | $b_{Pre}$               | $b_{(LC \times Pre)}$ | $R^2$        |
|------------------------------|-------------------------|---------------------------|-------------------------|-----------------------|--------------|
| LC                           | 0.416 (0.159) *         | -0.707 (0.208) **         |                         |                       | 0.112        |
| LC + Pre                     | 0.452 (0.159) **        | -0.768 (0.209) ***        | -0.168 (0.104)          |                       | 0.129        |
| <b>LC + Pre + (LC x Pre)</b> | <b>0.485 (0.160) **</b> | <b>-0.782 (0.208) ***</b> | <b>-0.323 (0.153) *</b> | <b>0.252 (0.207)</b>  | <b>0.138</b> |
| Follow-up - Pre              | $b_0$                   | $b_{LC}$                  | $b_{Pre}$               | $b_{(LC \times Pre)}$ | $R^2$        |
| <b>LC</b>                    | <b>0.276 (0.165)</b>    | <b>-0.470 (0.216) *</b>   |                         |                       | <b>0.112</b> |
| LC + Pre                     | 0.295 (0.167)           | -0.502 (0.220) *          | -0.089 (0.109)          |                       | 0.129        |
| LC + Pre + (LC x Pre)        | 0.293 (0.168)           | -0.486 (0.221) *          | -0.055 (0.118)          | -0.209 (0.208)        | 0.138        |

Table S1. Regression equations are determined by best-fit model (in bold); Dependent Variable = Post-test – Pre-test or Follow-up test – Pre-test; LC = laboratory completed, where Lizard Lab = 0 and Human Genetics Lab = 1; Pre = standardized pre-test score; LC x pre = Interaction term of laboratory completed and standardized pre-test score;  $R^2$  is adjusted  $R^2$ ;  $***p < 0.001$ ,  $**p < 0.01$ ,  $*p < 0.05$ .

**Table S2***Racial Privilege Regression Table for Spring 2022*

| Post-test – Pre-test                          | $b_0$                | $b_{LC}$              | $b_{Pre}$                 | $b_{Race}$               | $b_{(LC \times Pre)}$ | $b_{(LC \times Race)}$ | $R^2$        |
|-----------------------------------------------|----------------------|-----------------------|---------------------------|--------------------------|-----------------------|------------------------|--------------|
| LC                                            | 0.151 (0.162)        | -0.259 (0.219)        |                           |                          |                       |                        | 0.005        |
| LC + Pre                                      | 0.105 (0.156)        | -0.180 (0.211)        | -0.312 (0.106) **         |                          |                       |                        | 0.091        |
| LC+ Pre + Race                                | 0.203 (0.185)        | -0.232 (0.221)        | -0.347 (0.091) ***        | -0.656 (0.242) **        |                       |                        | 0.120        |
| <b>LC + Pre + Race +<br/>(LC x Pre)</b>       | <b>0.201 (0.187)</b> | <b>-0.231 (0.223)</b> | <b>-0.381 (0.118) ***</b> | <b>-0.671 (0.252) **</b> | <b>0.056 (0.169)</b>  |                        | <b>0.110</b> |
| LC + Pre + Race + (LC x<br>Pre) + (LC x Race) | 0.190 (0.195)        | -0.211 (0.239)        | -0.372 (0.126) **         | -0.591 (0.309)           | 0.046 (0.175)         | -0.211 (0.499)         | 0.099        |
| Follow-up – Pre-test                          | $b_0$                | $b_{LC}$              | $b_{Pre}$                 | $b_{Race}$               | $b_{(LC \times Pre)}$ | $b_{(LC \times Race)}$ | $R^2$        |
| LC                                            | 0.106 (0.163)        | -0.189 (0.221)        |                           |                          |                       |                        | -0.003       |
| LC + Pre                                      | 0.072 (0.161)        | -0.131 (0.218)        | -0.232 (0.109)            |                          |                       |                        | 0.038        |
| <b>LC+ Pre + Race</b>                         | <b>0.085 (0.185)</b> | <b>-0.138 (0.222)</b> | <b>-0.236 (0.087) **</b>  | <b>-0.086 (0.310)</b>    |                       |                        | <b>0.027</b> |
| LC + Pre + Race +<br>(LC x Pre)               | 0.087 (0.186)        | -0.139 (0.224)        | -0.208 (0.127)            | -0.073 (0.324)           | -0.048<br>(0.173)     |                        | 0.015        |
| LC + Pre + Race + (LC x<br>Pre) + (LC x Race) | 0.052 (0.196)        | -0.077 (0.242)        | -0.179 (0.139)            | 0.175 (0.439)            | -0.080<br>(0.180)     | -0.658 (0.553)         | 0.012        |

Table S2. Regression equations are determined by best-fit model (in bold); Dependent Variable = Post-test – Pre-test or Follow-up test – Pre-test; LC = laboratory completed, where Lizard Lab = 0 and Human Genetics Lab = 1; Pre = standardized pre-test score; LC x pre = Interaction term of laboratory completed and standardized pre-test score;  $R^2$  is adjusted  $R^2$ ; Coefficient standard error in parentheses. \*\*\* $p < 0.001$ , \*\* $p < 0.01$ , \* $p < 0.05$ .

**Table S3***Institutional Discrimination Regression Table for Spring 2022*

| Post-test – Pre-test                          | $b_0$                | $b_{LC}$              | $b_{Pre}$                | $b_{Race}$            | $b_{(LC \times Pre)}$ | $b_{(LC \times Race)}$ | $R^2$        |
|-----------------------------------------------|----------------------|-----------------------|--------------------------|-----------------------|-----------------------|------------------------|--------------|
| LC                                            | 0.117 (0.162)        | -0.235 (0.219)        |                          |                       |                       |                        | 0.002        |
| LC + Pre                                      | 0.122 (0.156)        | -0.249 (0.210)        | -0.298 (0.105) **        |                       |                       |                        | 0.081        |
| <b>LC + Pre + Race</b>                        | <b>0.086 (0.201)</b> | <b>-0.227 (0.228)</b> | <b>-0.297 (0.103) **</b> | <b>0.229 (0.387)</b>  |                       |                        | <b>0.075</b> |
| LC + Pre + Race +<br>(LC x Pre)               | 0.085 (0.203)        | -0.228 (0.230)        | -0.176 (0.132)           | 0.222 (0.375)         | -0.216 (0.196)        |                        | 0.076        |
| LC + Pre + Race + (LC x<br>Pre) + (LC x Race) | 0.119 (0.210)        | -0.287 (0.242)        | -0.176 (0.132)           | 0.010 (0.380)         | -0.211 (0.197)        | 0.595 (0.843)          | 0.072        |
| Follow-up – Pre-test                          | $b_0$                | $b_{LC}$              | $b_{Pre}$                | $b_{Race}$            | $b_{(LC \times Pre)}$ | $b_{(LC \times Race)}$ | $R^2$        |
| LC                                            | -0.033 (0.163)       | 0.042 (0.221)         |                          |                       |                       |                        | -0.012       |
| LC + Pre                                      | -0.028 (0.158)       | 0.029 (0.213)         | -0.227 (0.106) *         |                       |                       |                        | 0.055        |
| <b>LC + Pre + Race</b>                        | <b>0.005 (0.178)</b> | <b>0.010 (0.218)</b>  | <b>-0.297 (0.106) **</b> | <b>-0.209 (0.206)</b> |                       |                        | <b>0.047</b> |
| LC + Pre + Race +<br>(LC x Pre)               | 0.004 (0.181)        | 0.009 (0.219)         | -0.216 (0.120)           | -0.212 (0.198)        | -0.112 (0.202)        |                        | 0.039        |
| LC + Pre + Race + (LC x<br>Pre) + (LC x Race) | 0.024 (0.192)        | -0.024 (0.241)        | -0.216 (0.122)           | -0.336 (0.270)        | -0.110 (0.202)        | 0.346 (0.365)          | 0.029        |

Table S3. Regression equations are determined by best-fit model (in bold); Dependent Variable = Post-test – Pre-test or Follow-up test – Pre-test; LC = laboratory completed, where Lizard Lab = 0 and Human Genetics Lab = 1; Pre = standardized pre-test score; LC x pre = Interaction term of laboratory completed and standardized pre-test score;  $R^2$  is adjusted  $R^2$ ; Coefficient standard error in parentheses. \*\*\* $p < 0.001$ , \*\* $p < 0.01$ , \* $p < 0.05$ .

**Table S4***Color-evasive Ideologies Regression Table for Fall 2022*

| Pre-Post                     | $b_0$         | $b_{Pre}$        | $b_{Race}$     | $b_{(PreXRace)}$ | $R^2$ |
|------------------------------|---------------|------------------|----------------|------------------|-------|
| Racial Privilege             | 0.032 (0.088) | -0.335 (0.092) * | -0.155 (0.307) | -0.060 (0.282)   | 0.101 |
| Institutional Discrimination | -0.039(0.090) | -0.211 (0.092) * | 0.685 (0.406)  | 0.103 (0.393)    | 0.087 |

*Table S4. Regression equation determined by mixed model analysis. Dependent Variable = Post-test – Pre-test; Race = Student Race, where white = 0 and non-white = 1; Pre = standardized pre-test score; Pre X Race = Interaction term of standardized pre-test score and student race;  $R^2$  is psuedo- $R^2$ ; \*\*\* $p < 0.001$ , \* $p < 0.05$ ,  $p < 0.05$ .*

## **Finalized Survey Subscales**

### *Race Conceptions Scale (Biological Essentialism)*

1. The same racial categories have pretty much always existed.
2. If a white American family traveled around the world, people they met would probably think of them as white, too.
3. Generally speaking, two Black people will always look more similar to each other than a Black person and a white person ever would.
4. A person's race is fixed at birth.
5. There's agreement across cultures about which racial groups people fall into.
6. It's easy to tell what race people are by looking at them.
7. Racial groups are primarily determined by biology.

### *Color-Blind Racial Attitudes Scale*

#### Factor 1: Unawareness of *Racial Privilege*

1. Race plays a major role in the type of social services (such as type of health care or day care) that people receive in the U.S. (Reverse Scored)
2. Race is very important in determining who is successful and who is not. (Reverse Scored)
3. Racial and ethnic minorities do not have the same opportunities as white people in the U.S. (Reverse Scored)
4. White people in the U.S. have certain advantages because of the color of their skin. (Reverse Scored)
5. White people are more to blame for racial discrimination in the U.S. than racial and ethnic minorities. (Reverse Scored)
6. Race plays an important role in who gets sent to prison. (Reverse Scored)

Factor 2: Unawareness of *Institutional Discrimination*

1. It is important that people begin to think of themselves as American and not African American, Mexican American or Italian American.
2. White people in the U.S. are discriminated against because of the color of their skin.
3. Social policies, such as affirmative action, discriminate unfairly against white people.
4. Racial and ethnic minorities in the U.S. have certain advantages because of the color of their skin.
