# Supplementary material for: Challenging Misconceptions about Race in Undergraduate Genetics
Source: Atypon-hosted journal article supplement (doi:10.1187/cbe.23-12-0228), 2024-07-09

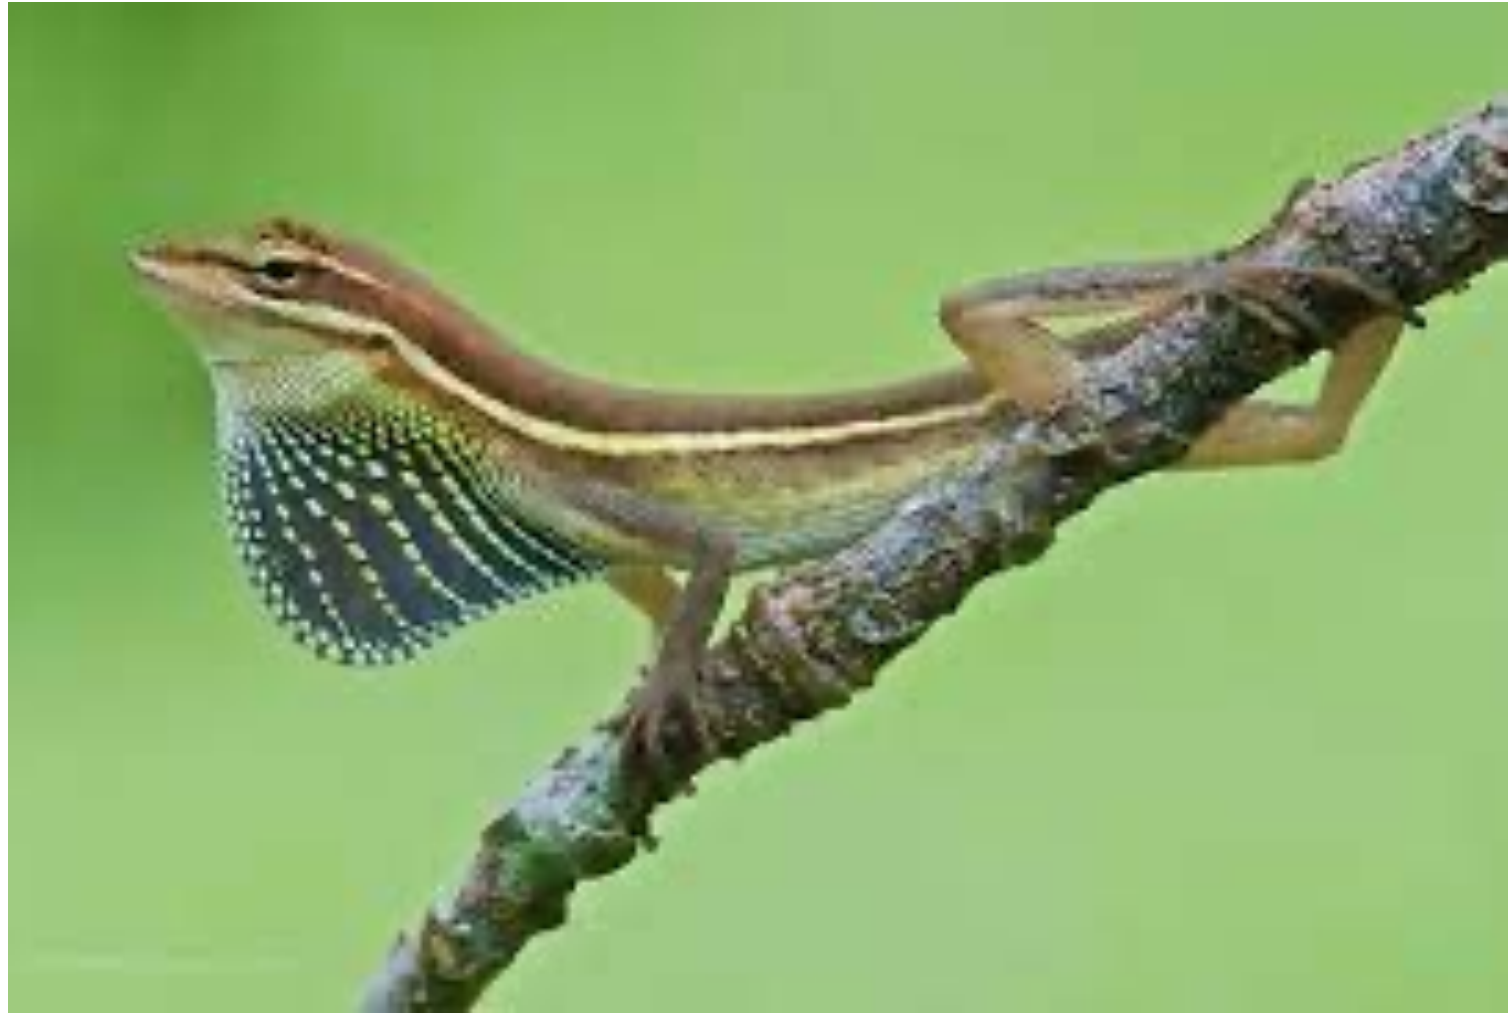

# Lizard Phylogeny

# SNPs

---

## Single Nucleotide Polymorphism

- a variation in a single nucleotide position

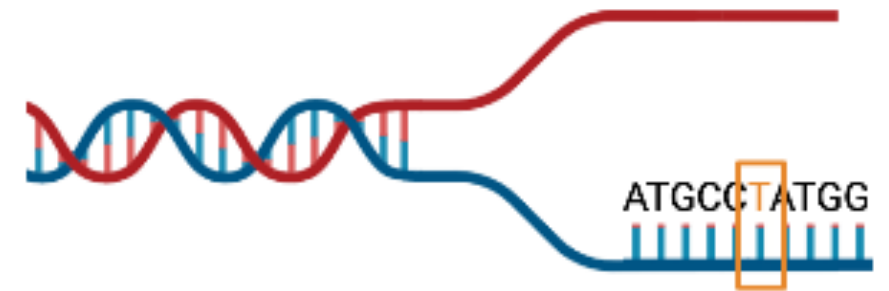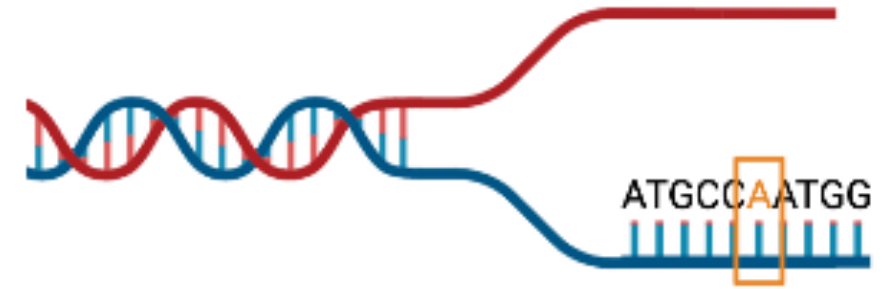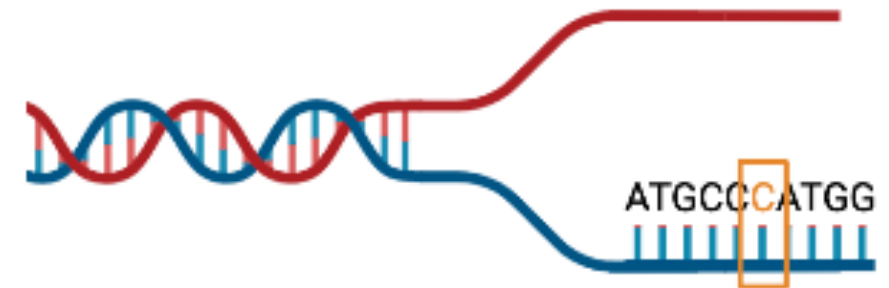

# Ancestry

---

- line of descent : lineage

# Phylogenetic Tree

---

- SNPs used represent “genome”
- Shows evolutionary history
- Equates to ancestry

# Adaptation

---

A structure or function that confers greater ability to survive and reproduce in a particular environment

# Adaptation

---

A structure or function that confers greater ability to survive and reproduce in a particular environment

# Adaptive Radiation

---

When ancestral species diversifies into many descendant species that occupy different environmental niches

# Convergent Evolution

---

Different groups of organisms can independently evolve similar traits by adapting to similar environments or ecological niches



---

How are ecomorphs of anole lizards in the Caribbean are examples of both adaptive radiation and convergent evolution?

---

# Adaptive radiation:

---

The ancestral anoles were dispersed onto different islands. These anoles on the different islands diversified into different species that occupy different ecological

niches:

Parts of the tree

Grasses

Bushes

# Convergent evolution:

---

The anoles on each of these islands evolved independently but similarly because the environments (ecological niches) on each of these islands were similar.

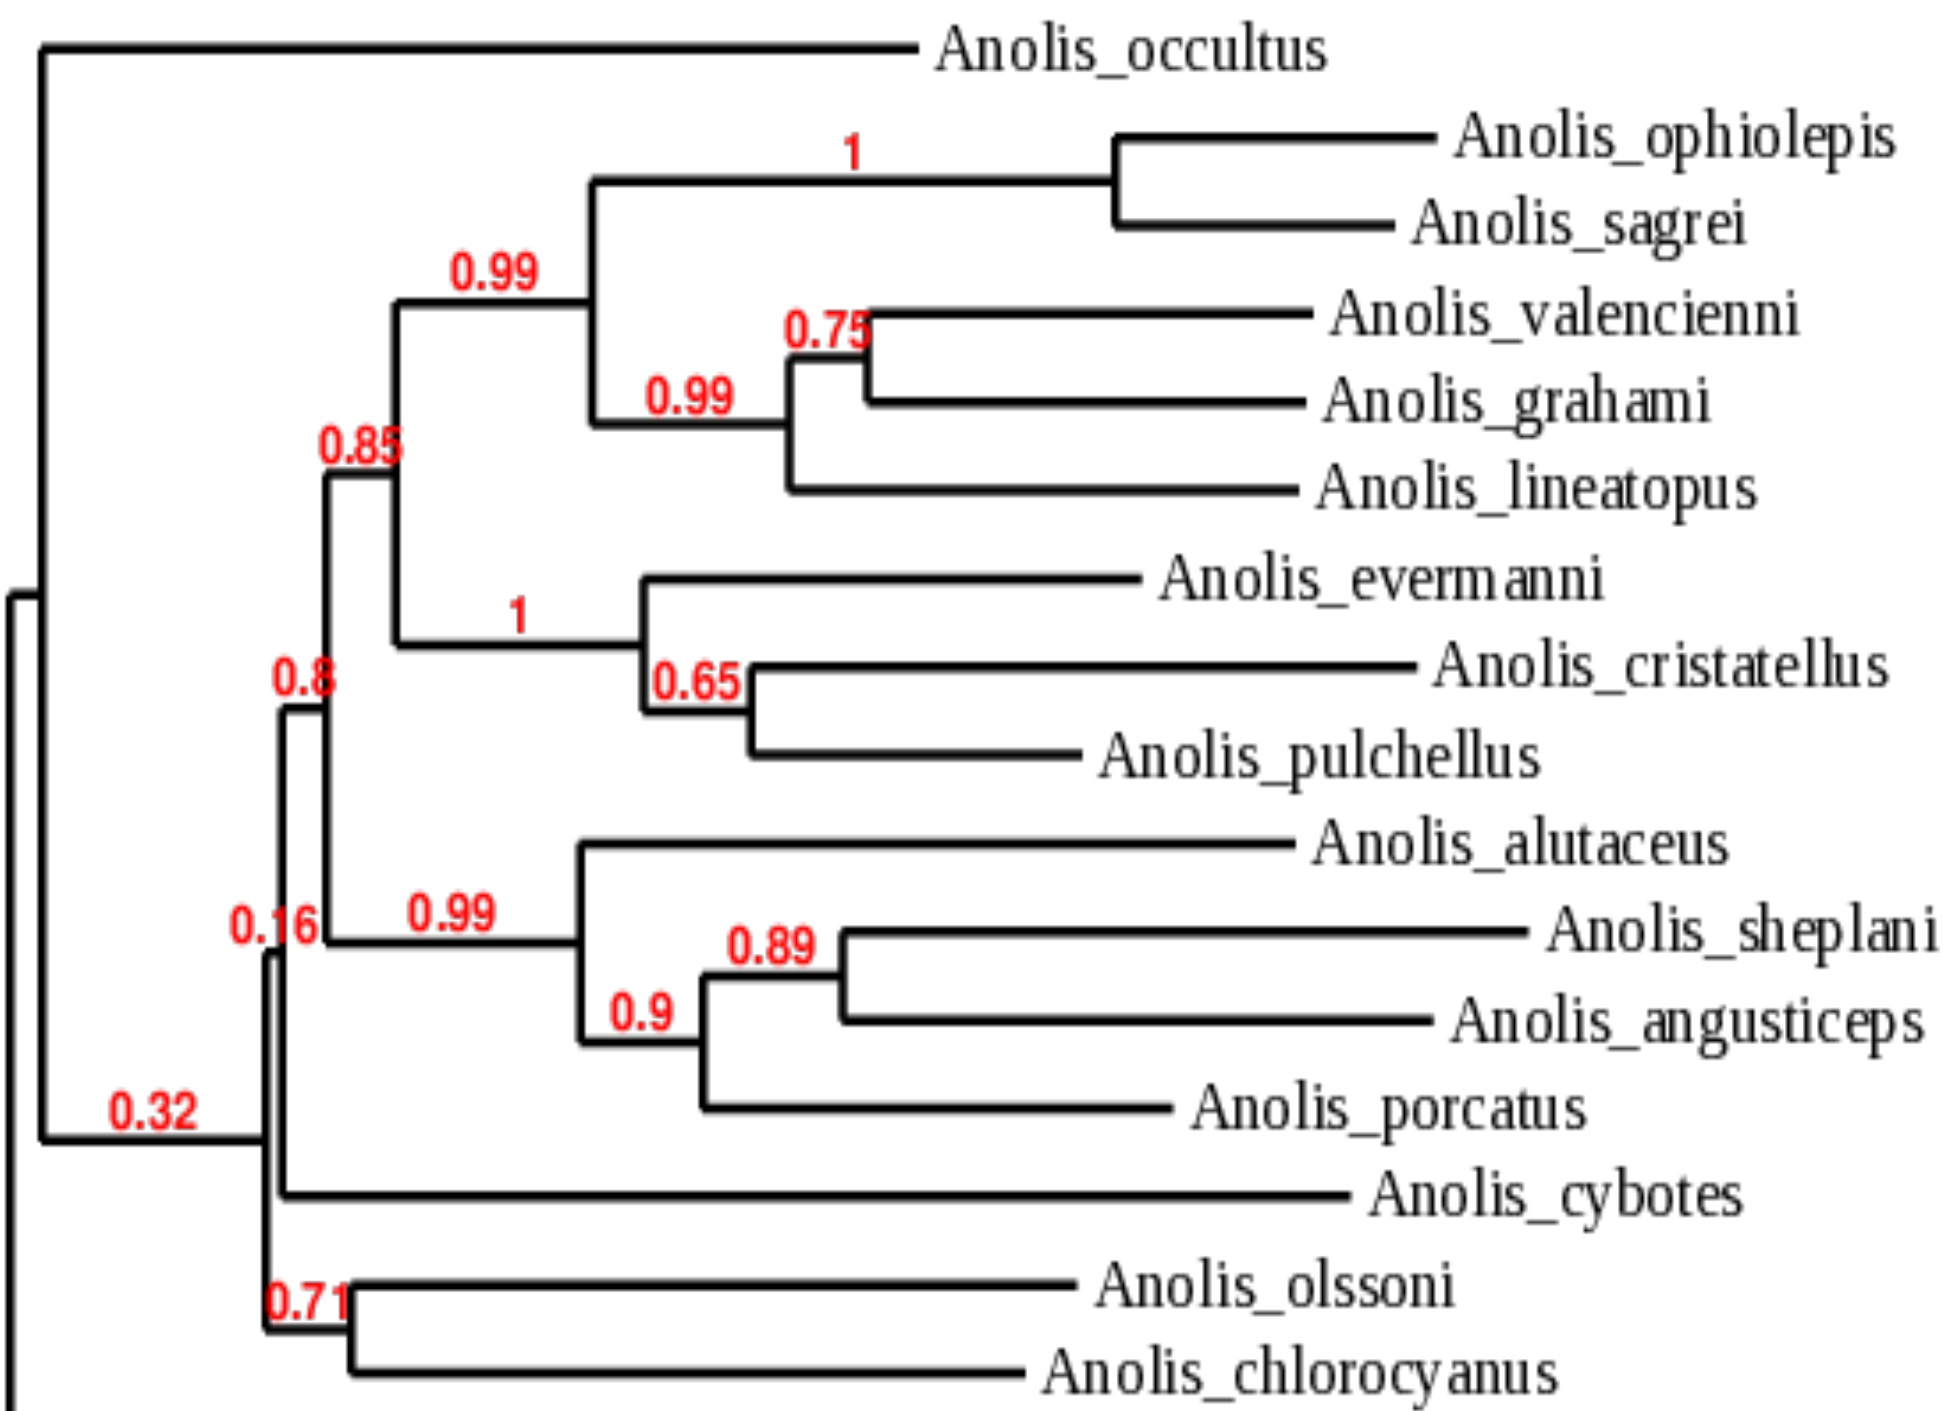

Supplement: sm4-lizard_phylogeny_activity.pdf [file sm4-lizard_phylogeny_activity.pdf]
